# Supplementary material
Source: Springer Nature journal article supplement (https://www.springermedizin.de/resource/supplementary/12967_2011_966_MOESM3_ESM.pdf/9577188)

IF\_15

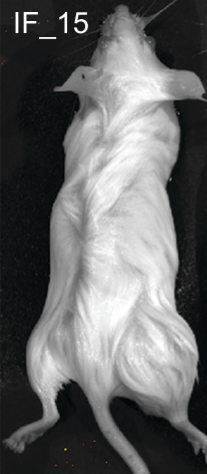

IF\_14

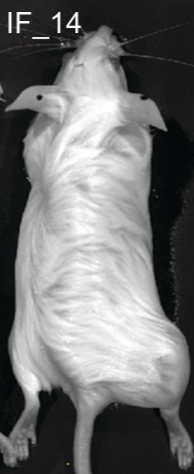

IF\_16

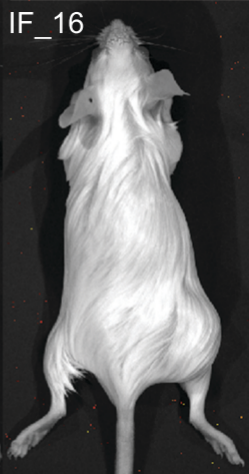

Supplement: MOESM3 [file 9577188]
